1  
2  
3  
4  
5  
6  
7  
8  
9  
10  
11  
12  
13  
14  
15  
16  
17  
18  
19  
20  
21

**Non-canonical roles of caspase-4 and caspase-5 in heme driven- IL-1 $\beta$  release and cell death**

**Beatriz E. Bolívar<sup>1, 2</sup>, Alexandra N. Brown,<sup>1, 2</sup> Brittany A. Rohrman<sup>1</sup>, Chloé I. Charendoff<sup>1</sup>, Vanda Yazdani <sup>1, 2</sup>, John D. Belcher<sup>3</sup>, Gregory M. Vercellotti<sup>3</sup>, Jonathan M. Flanagan<sup>1, 2</sup> and Lisa Bouchier-Hayes<sup>1, 2, 4\*</sup>**

<sup>1</sup>Department of Pediatrics, Division of Hematology-Oncology, Baylor College of Medicine, Houston, TX 77030, USA.

<sup>2</sup>William T. Shearer Center for Human Immunobiology, Texas Children’s Hospital, Houston, TX 77030, USA.

<sup>3</sup>Department of Medicine, Division of Hematology, Oncology and Transplantation, University of Minnesota, Minneapolis, MN 55455, USA.

<sup>4</sup>Department of Molecular and Cellular Biology, Baylor College of Medicine, Houston, TX 77030, USA.

\*Corresponding author:

**Lisa Bouchier-Hayes** E-mail: [bouchier@bcm.edu](mailto:bouchier@bcm.edu)

22 **Footnotes**

23 Funding for the project includes NIH/NIDDK T32DK060445 (BEB, BAR), NIH/NIDDK  
24 F32DK121479 (BEB), NIH/NIGMS R01GM121389 (LBH), NIH/NHLBI R01HL114567 (JDB,  
25 GMV), NIH/NHLBI R01-HL136415 (JMF), and CPRIT-RP180672, NIHCA125123 and  
26 NIHRR024574 (Cytometry and Cell Sorting Core at Baylor College of Medicine)

27

28

29 Abbreviations used in this article: ASC, apoptosis-associated speck-like protein containing a  
30 CARD; BiFC, bimolecular fluorescence complementation; CARD, caspase recruitment domain;  
31 DAMP, damage-associated molecular pattern; GM-CSF, granulocyte-macrophage colony-  
32 stimulating factor; GSDMD, gasdermin D; hMDM, human monocyte-derived macrophages; IFN,  
33 interferon; IL, interleukin; LPS, lipopolysaccharide; NLR, NOD-like receptor; NLRC, NLR family  
34 CARD containing; NLRP, NLR family pyrin domain containing; PBMC, peripheral blood  
35 mononuclear cells; SCD, sickle cell disease; TLR, toll like receptor

36

37 **Running Title**

38 Heme activates inflammatory caspases

39 **Abstract**

40 Excessive release of heme from red blood cells is a key pathophysiological feature of several  
41 disease states including bacterial sepsis, malaria, and sickle cell disease. This hemolysis results  
42 in an increased level of free heme that has been implicated in the inflammatory activation of  
43 monocytes, macrophages, and endothelium. Here, we show that extracellular heme engages the  
44 human inflammatory caspases, caspase-1, caspase-4, and caspase-5, resulting in the release of  
45 IL-1 $\beta$ . Heme-induced IL-1 $\beta$  release was further increased in macrophages from patients with  
46 sickle cell disease. In human primary macrophages, heme activated caspase-1 in an  
47 inflammasome-dependent manner, but heme-induced activation of caspase-4 and caspase-5  
48 was independent of canonical inflammasomes. Furthermore, we show that both caspase-4, and  
49 caspase-5 are essential for heme-induced IL-1 $\beta$  release, while caspase-4 is the primary  
50 contributor to heme-induced cell death. Together, we have identified that extracellular heme acts  
51 as a damage associated molecular pattern (DAMP) that can engage canonical and non-canonical  
52 inflammasome activation as a key mediator of inflammation in macrophages.

53

54

55 **Key Points**

- 56 1. Heme induces oligomerization of caspase-1, caspase-4, and caspase-5.
- 57 2. Heme-induced IL-1 $\beta$  release requires both caspase-4 and caspase-5.
- 58 3. Caspase-4 alone contributes to heme-induced cell death.

59

60 **Key words**

61 Heme, inflammasome, caspase-1, caspase-4, caspase-5

## 62 **Introduction**

63 The interactions between inflammatory caspases and inflammasomes are critical for preventing  
64 uncontrolled inflammation and for mediating appropriate inflammation under infectious and sterile  
65 conditions. Inflammasomes are multi-protein complexes that provide the platform for recruitment  
66 and activation of inflammatory caspases and are essential for cellular inflammatory responses  
67 (1). The inflammatory caspases include the human caspases-1, -4, and -5 and murine caspase-  
68 11 (1). This subset of the broader caspase protease family does not mediate apoptosis, but  
69 specifically regulates inflammation by facilitating the activation and release of the pro-  
70 inflammatory cytokines interleukin (IL)-1 $\beta$  and IL-18 (2). While the essential nature of  
71 inflammatory caspases in pathogen clearance is well established, their role in sterile inflammation  
72 (inflammation in the absence of infection) is less clear. Sterile inflammation occurs when non-  
73 pathogenic inflammatory stimuli activate inflammasomes. These stimuli are known as damage-  
74 associated molecular patterns (DAMPs) and are generally endogenous signals released by dying  
75 cells. This type of inflammation is important for wound healing and tissue regeneration but, if  
76 unchecked, can contribute to tissue damage associated with conditions like ischemic stroke,  
77 myocardial infarction, and neurodegeneration (3). Despite the importance of DAMPs for triggering  
78 inflammation, the endogenous signaling molecules that trigger sterile inflammation are not fully  
79 resolved (4).

80

81 Heme has the features of a DAMP because it is released following red blood cell destruction and  
82 triggers an inflammatory response. Extracellular hemoglobin and heme are highly pro-oxidant  
83 molecules that are assiduously scavenged by haptoglobin and hemopexin, respectively.  
84 Excessive hemolysis can saturate and deplete the haptoglobin and hemopexin systems, resulting  
85 in free heme with strong pro-inflammatory capabilities (5). Heme has been shown to activate  
86 caspase-1 in mouse macrophages via assembly of the NOD-like receptor family pyrin domain  
87 containing 3 (NLRP3) inflammasome (6). Heme has also been shown to activate toll-like receptor

88 (TLR) 4 in murine endothelial cells to activate NF $\kappa$ B (7). For IL-1 $\beta$  release to proceed, two signals  
89 are needed. Signal 1 activates NF $\kappa$ B to induce pro-IL-1 $\beta$  expression and expression of additional  
90 inflammasome proteins including NLRP3, in a process known as priming. Signal 2 provides an  
91 intracellular signal that induces inflammasome assembly and caspase-1 activation that cleaves  
92 pro-IL-1 $\beta$  to its mature form, which is released from the cell (8). Heme is naturally taken up and  
93 recycled by macrophages, providing a physiological intracellular Signal 2 (44). Due to its ability to  
94 activate both caspase-1 and TLR4 and to be internalized by macrophages, extracellular heme  
95 has the properties of a DAMP that could potentially provide both Signal 1 and Signal 2 to initiate  
96 an effective inflammatory response.

97

98 Excessive release of heme from red blood cells is a key feature of several pathological states,  
99 including sepsis, malaria, and sickle cell disease (SCD). SCD is the most prevalent inherited blood  
100 disorder, affecting approximately 100,000 Americans and millions worldwide (9). The clinical  
101 manifestations of SCD arise from a complex pathophysiology including chronic hemolytic anemia,  
102 increased susceptibility to infection, and vaso-occlusive events (10). Chronically elevated heme  
103 levels induce the inflammatory activation of monocytes, macrophages, and the endothelium (7,  
104 11, 12). This inflammation can result in vaso-occlusion, acute chest syndrome, and organ damage  
105 (5, 7, 13). Heme-induced activation of monocytes and macrophages contributes to these severe  
106 complications through release of inflammatory cytokines, like IL-1 $\beta$ , that trigger endothelial  
107 activation, upregulation of adhesion factors, and vaso-occlusion (14, 15). Indeed, in a study of  
108 children with SCD, patients having a vaso-occlusive pain crisis demonstrated elevated levels of  
109 proinflammatory cytokines IL-1 $\beta$ , IL-6, IL-10, tumor necrosis factor (TNF)- $\alpha$ , and free heme (16).  
110 The role of the inflammatory caspases in heme-induced inflammation in the context of hemolytic  
111 disorders such as SCD has not been well studied.

112

113 Mice deficient in caspase-1 or the inflammasome proteins NLRP3 or apoptosis-associated speck-  
114 like protein containing a CARD (ASC) survive following hemolysis induced by a lethal dose of  
115 phenylhydrazine (6). Thus, caspase-1 is essential for an effective inflammatory response to  
116 hemolysis. However, the roles of caspase-4 and caspase-5 in this process are unknown.  
117 Caspase-4 and caspase-5 are the human orthologues of murine caspase-11. Caspase-4, -5, and  
118 -11 have been shown to be activated by intracellular LPS independent of inflammasomes and  
119 they each have been shown to cleave the pore-forming protein gasdermin D (GSDMD) (17-19).  
120 Cleavage of GSDMD allows its N-terminal fragment to insert in the plasma membrane forming a  
121 pore predicted to be 180 Å in diameter (20). This pore is of sufficient size to allow release of  
122 mature IL-1 $\beta$ , but also permits influx of ions leading to cell swelling and a necrotic form of cell  
123 death called pyroptosis (21-23). Although caspase-1 can also cleave GSDMD, blocking caspase-  
124 1-dependent cleavage delays, but does not inhibit, pyroptosis (17). Therefore, current thinking is  
125 that caspase-1 cleaves pro-IL-1 $\beta$  and pro-IL-18, while caspase-4, caspase-5, and caspase-11  
126 cleave GSDMD to induce pyroptosis, allowing active cytokine release. It has been proposed that  
127 cytokine release and pyroptosis cannot be uncoupled (24). However, contradicting this theory,  
128 some reports show living cells releasing IL-1 $\beta$  (25, 26). Here, we show that heme induces  
129 inflammasome-dependent caspase-1 activation and inflammasome-independent caspase-4 and  
130 caspase-5 activation. Furthermore, we show that both caspase-4 and caspase-5 are essential for  
131 IL-1 $\beta$  release and caspase-4 contributes to heme-induced cell death.



## 132 **Materials and Methods**

133

### 134 *Chemicals and antibodies*

135 The following antibodies were used: anti-Caspase-1 (D7F10 from Cell Signaling Technology,  
136 Danvers, MA, USA), anti-Caspase-4 (4450 from Cell Signaling Technology, Danvers, MA, USA),  
137 anti-Caspase-5 (D3G4W from Cell Signaling Technology, Danvers, MA, USA); anti-actin (C4 from  
138 MP Biomedicals); anti-GSDMD (G7422 from Sigma-Aldrich, St. Louis, MO, USA), anti-GSDMD  
139 N-term (E7H9G from Cell Signaling Technology, Danvers, MA, USA), anti-IL-1 $\beta$  (MAB601, R&D  
140 Systems, Inc., Minneapolis, MN, USA), anti-IL-1 $\beta$  cleaved, Asp116 (PA5-105048 from Thermo  
141 Fisher, Waltham, MA, USA). All cell culture media reagents were purchased from Thermo Fisher  
142 (Waltham, MA, USA). Ultrapure LPS (from E. coli O111:B4) was purchased from Invivogen (San  
143 Diego, CA, USA). Unless otherwise indicated, all other reagents were purchased from Sigma-  
144 Aldrich (St. Louis, MO, USA).

145

### 146 *Plasmids*

147 The pBiFC.VC155 and pBiFC.VN173 plasmids encoding C1-Pro, C4-Pro, or C5-Pro were  
148 described previously (27). Single mutations were introduced using QuikChange Site-Directed  
149 Mutagenesis Kit (Agilent Technologies, Santa Clara, CA, USA). The bicistronic vector consists of  
150 C1-Pro VC and C1-Pro VN linked with a 2A peptide. Silent mutations were introduced into the  
151 second C1-Pro nucleotide sequence to prevent the sequence recombining out during cloning due  
152 to the presence of two identical C1 Pro sequences. The sequence was generated by IDT  
153 (Coralville, IA, USA) and cloned into pRRL-MND-MCS-2A-mCherry-2A-Puro. pDsRed-mito was  
154 purchased from Clontech (Takara, Mountain View, CA, USA). Each construct was verified by  
155 sequencing.

156

### 157 *Preparation and culture of primary human monocyte-derived macrophages*

158 Whole blood samples were obtained from patients with SCD who attend our hematology clinic as  
159 part of their routine care. The study was approved by the Baylor College of Medicine Institutional  
160 Review Board, and informed consent was obtained from all participants, or legal guardian (if  
161 participants were minor). To isolate peripheral blood mononuclear cells, whole blood obtained  
162 from healthy blood donors or SCD patients was separated using the Ficoll Paque (GE Healthcare,  
163 Pittsburg, PA, USA) gradient protocol (28). CD14<sup>+</sup> monocytes were isolated from peripheral blood  
164 mononuclear cells (PBMC) using magnetic bead selection (Miltenyi Biotec, San Diego, CA, USA).  
165 To differentiate cells into macrophages, monocytes were seeded at  $5 \times 10^6$  -  $1 \times 10^7$ /10 cm dish in  
166 RPMI-1640 medium supplemented with FCS (10% (v/v)), glutamax (2 mM), and Penicillin/  
167 Streptomycin (50 I.U./50 µg/ml) and granulocyte-macrophage colony-stimulating factor (GM-CSF;  
168 50 ng/mL). Cells were allowed to adhere overnight and culture media was exchanged the  
169 following day for fresh GM-CSF-supplemented media. Media was exchanged every 2-3 days and  
170 were considered fully differentiated at 7 days, as determined by morphology. To differentiate into  
171 M2 macrophages, media was exchanged and cells were incubated for additional 24 hours in  
172 media supplemented with IL-4 (50 ng/mL). For the matched M1 macrophages, cells were  
173 incubated in fresh GM-CSF supplemented media for an additional day.

174

#### 175 *Heme preparation and administration*

176 Heme solution was prepared immediately before use by solubilizing 3.3 mg of porcine hemin,  
177 (oxidized version of heme) in 100 µL of NaOH solution (0.1-1.0 M). The mixture was vortexed for  
178 5 min in the dark. 900 µL of serum-free RPMI-1640 media was added to the resulting solution and  
179 vortexed for an additional 5 min in the dark followed by filtration through a sterile 0.22 µm spin  
180 filter. The term “heme” is used generically to refer to both heme and hemin. Unless otherwise  
181 indicated, cells were treated with heme in the presence of 0.1% FBS in the culture media to  
182 prevent components present in FBS sequestering and inhibiting heme. Heme is rapidly recycled  
183 by circulating macrophages, therefore, to mimic the transient exposure of cells to heme and to

184 limit its toxicity, where indicated, cells were exposed to heme for 1 h followed by addition of an  
185 equal volume of culture media containing 10% FBS to inactivate the heme.

186

187 *Cell culture and generation of cell lines*

188 THP-1 cells were grown in RPMI medium containing FBS (10% (v/v)), glutamax (2 mM), and  
189 Penicillin/ Streptomycin (50 I.U./50 µg/ml). MCF-7 cells were grown in Dulbecco's Modified  
190 Essential Medium (DMEM) containing FBS (10% (v/v)), L-glutamine (2 mM), and Penicillin/  
191 Streptomycin (50 I.U./50 µg/ml). *CASP1*-deficient THP-1 cells were purchased from Invivogen  
192 (San Diego, CA, USA). Caspase-4 and caspase-5 were deleted from THP-1 cells using an  
193 adaptation of the CRISPR/Cas9 protocol described in (29). Protospacer sequences for each  
194 target gene were identified using the CRISPRscan scoring algorithm ([www.crisprscan.org](http://www.crisprscan.org) (30)).  
195 DNA templates for sgRNAs were made by PCR using pX459 plasmid containing the sgRNA  
196 scaffold sequence and using the following primers:

197  $\Delta$ CASP4(40) sequence:

198 TTAATACGACTCACTATAGGGAAACAACCGCACACGCCgtttagagctagaaatagc;

199  $\Delta$ CASP5(46) sequence:

200 TTAATACGACTCACTATAGGTCCTGGAGAGACCGCACAgtttagagctagaaatagc;

201  $\Delta$ CASP5(53) sequence:

202 TTAATACGACTCACTATAGGTCAAGGTTGCTCGTTCTAgtttagagctagaaatagc;

203 universal reverse primer: AGCACCGACTCGGTGCCACT. sgRNAs were generated by *in vitro*  
204 transcription using the Hiscribe T7 high yield RNA synthesis kit (New England Biolabs, Ipswich,  
205 MA, USA). Purified sgRNA (0.5 µg) was incubated with Cas9 protein (1 µg, PNA Bio, Newbury  
206 Park, CA, USA) for 10 min at room temperature. THP-1 cells were electroporated with the  
207 sgRNA/Cas9 complex using the Neon transfection system (Thermo Fisher Scientific, Waltham,  
208 MA, USA) at 1600V, 10ms, and 3 pulses. For the caspase-5 deficient cell line, two sgRNA were

209 selected at either end of the gene to delete the intervening region. Deletion of *CASP4* or *CASP5*  
210 was confirmed by western blot or by PCR. Single cell clones were generated by single cell plating  
211 of the parental cell line. Gene deletion in the single cell clones was confirmed by sequencing.

212

### 213 *Transient Transfection and siRNA*

214 For transfection of hMDM,  $1 \times 10^5$  cells were transfected with the appropriate plasmid  
215 combinations or plasmid/siRNA combinations using the Neon Transfection System (Thermo  
216 Fisher, Waltham, MA, USA) and a 10  $\mu$ L Neon tip at 1000 V, 40 ms, and 2 pulses. Cells were  
217 transfected with amounts of the relevant expression plasmids as described in the figure legends.  
218 A total of 4 wells were transfected for every plasmid and incubated in 200  $\mu$ L of antibiotic-free  
219 media. After 1 h, 200  $\mu$ L of complete growth media containing Penicillin/ Streptomycin (50 I.U./50  
220  $\mu$ g/ml) was added. Expression was allowed for 24 h and media was exchanged for fresh media  
221 prior to treatment. Control siRNAs were siCyclophilin B (ON-TARGETplus SMARTpool from  
222 Dharmacon). ASC and NLRP3 siRNAs were ON-TARGETplus SMARTpool (Dharmacon Inc,  
223 Lafayette, CO, USA).  $1 \times 10^5$  MCF-7 cells were transfected with appropriate plasmid combinations  
224 using Lipofectamine 2000 transfection reagent (Thermo Fisher Scientific, Waltham, MA, USA)  
225 according to manufacturer's instructions.

226

### 227 *Microscopy*

228 Cells were imaged using a spinning disk confocal microscope (Zeiss, Thornwood, NY, USA),  
229 equipped with a CSU-X1A 5000 spinning disk unit (Yokogawa Electric Corporation, Japan), multi  
230 laser module with wavelengths of 458 nm, 488 nm, 514 nm, and 561 nm, and an Axio Observer  
231 Z1 motorized inverted microscope equipped with a precision motorized XY stage (Carl Zeiss  
232 MicroImaging, Thornwood, NY, USA). Images were acquired with a Zeiss Plan-Neofluar 40x 1.3  
233 NA or 64x 1.4 NA objective on an Orca R2 CCD camera using Zen 2012 software (Zeiss,  
234 Thornwood, NY, USA). Cells were plated on dishes containing coverslips (Mattek Corp. Ashland,

235 MA, USA) coated with poly-D-lysine hydrobromide 24 h prior to treatment. For time-lapse  
236 experiments, media on the cells was supplemented with Hepes (20 mM) and 2-mercaptoethanol  
237 (55  $\mu$ M). Cells were allowed to equilibrate to 37°C in 5% CO<sub>2</sub> prior to focusing on the cells.

238

239

#### 240 *Image analysis*

241 Images were analyzed by drawing regions around individual cells and then computing average  
242 intensity the pixels for each fluor using Zen 2012 software (Zeiss, Thornwood, NY, USA). Data  
243 were scaled by the following formula: scaled point = (Max - x)/MaxDifference, where Max equals  
244 the maximum value in the series, x equals the point of interest, and MaxDifference equals the  
245 maximum minus the minimum value in the series.

246

#### 247 *ELISA IL-1 $\beta$ Measurements*

248 THP-1 cells were plated at 1x10<sup>6</sup> cells/ mL and differentiated into macrophages by 24 h incubation  
249 in the presence of phorbol 12-myristate 13-acetate (PMA; 10 ng/mL) followed by 24 hour  
250 incubation in RPMI medium. Cells were polarized into M1 macrophages by 20 h incubation with  
251 human interferon (IFN)- $\gamma$  (PeproTech, 20 ng/mL) and ultrapure LPS (10 pg/mL) (31). Cells were  
252 washed prior to treatment as indicated in the Figure Legends. IL-1 $\beta$  concentration in harvested  
253 clarified supernatants was measured with the IL-1 $\beta$  Duoset ELISA Kit (R&D Systems,  
254 Minneapolis, MN, USA) according to the manufacturer's instructions.

255

#### 256 *Flow cytometry and measurement of cell death*

257 Cells were treated as indicated and collected by centrifugation. Cells were washed with PBS and  
258 resuspended in 100  $\mu$ l of PBS supplemented with 5% FCS, 0.5% BSA, 2 mM EDTA and 1  $\mu$ l of

259 7-AAD (Thermo Fisher, Waltham, MA, USA). 7-AAD-positive cells were quantitated by flow  
260 cytometry and analyzed with FloJo software (FloJo LLC., Ashland, OR, USA).

261

### 262 *Immunoblotting*

263 Cells were treated as indicated. Cells were lysed in IP-lysis buffer (50 mM Tris pH 7.4, 150 mM  
264 NaCl, 0.1% SDS, 1% NP-40 containing protease inhibitors (cOmplete Mini Protease Inhibitor  
265 Cocktail). Protein concentration was determined by BCA assay (Thermo Fisher, Waltham, MA,  
266 USA). 25-35 µg total protein (lysate) or 30-60 µg culture media (supernatant) was resolved by  
267 SDS-PAGE and transferred onto 0.45 µm nitrocellulose membrane (Thermo Fisher, Waltham,  
268 MA, USA), and immunodetected using appropriate primary and peroxidase-coupled secondary  
269 antibodies (GE Healthcare Life Sciences, Pittsburg, PA, USA). Proteins were visualized by West  
270 Pico and West Dura chemiluminescence Substrate (Thermo Fisher, Waltham, MA, USA).

271

### 272 *Statistical Analysis*

273 Statistical comparisons were performed using two-tailed Student's t test or 1-way ANOVA  
274 calculated using Prism 6.0 (Graph Pad) software.

275 **Results**

276 ***Heme-induced IL-1 $\beta$  release from human macrophages requires priming***

277 It has been previously shown that heme can induce IL-1 $\beta$  release in LPS-primed murine bone  
278 marrow derived macrophages and that heme can activate TLR4 to induce NF $\kappa$ B activation in  
279 endothelial cells (6, 7). This suggests that heme can provide both the priming signal (Signal 1)  
280 required to induce pro-IL-1 $\beta$  expression and the inflammasome activating signal (Signal 2)  
281 required to induce inflammasome-dependent caspase-1 activation. To test this in human  
282 macrophages, we isolated CD14<sup>+</sup> monocytes from peripheral blood from healthy donors and  
283 differentiated them into macrophages with granulocyte-macrophage colony-stimulating factor  
284 (GM-CSF). We exposed the macrophages to heme in the presence or absence of prior priming  
285 with LPS. Treatment with heme in non-primed macrophages induced a modest increase in IL-1 $\beta$ .  
286 However, in order for heme to induce maximal IL-1 $\beta$  release, prior priming with LPS was required.  
287 Treatment with LPS alone resulted in similar IL-1 $\beta$  release to heme alone (Figure 1A). These  
288 experiments were carried out in 0.1% FBS in the culture media. This is because components  
289 present in serum including hemopexin and albumin bind to heme with high affinity and prevent its  
290 uptake into cells (32-35). To show that the IL-1 $\beta$  release was specific to heme and nothing else  
291 present in the formulation, we increased the amount of serum in the culture media. As little as 1%  
292 FBS concentration in the cellular media was sufficient to block heme-induced IL-1 $\beta$  release  
293 (Figure 1B), indicating that the IL-1 $\beta$  release from macrophages that we detected was due to the  
294 specific effects of heme.

295  
296 Sickle cell macrophages are constantly exposed to high levels of extracellular heme due to  
297 persistent hemolysis of sickled red blood cells (11). To determine the effect of this on IL-1 $\beta$   
298 release, we compared human monocyte-derived macrophages (hMDM) from healthy donors to  
299 hMDM isolated from patients with SCD. We noted that heme-treated hMDM from patients with  
300 SCD were more sensitive to heme-induced IL-1 $\beta$  release relative to the control hMDM (Figure

301 1C). However, priming with LPS was required for strong IL-1 $\beta$  release in both groups. Together,  
302 these results suggest that, while heme is able to activate caspase-1 to induce IL-1 $\beta$  release, it is  
303 not sufficient to prime the cells for IL-1 $\beta$  release.

304

305 It has been shown that macrophages from sickle mice express higher levels of M1 markers (36).  
306 To investigate IL-1 $\beta$  release by heme in the two extreme macrophage subtypes, we polarized the  
307 CD14<sup>+</sup> monocytes towards M1 (pro-inflammatory) by treating with GM-CSF for seven days or  
308 towards M2 (anti-inflammatory) by treating with IL-4 for a further day after the incubation with GM-  
309 CSF. LPS-primed M1 or M2 hMDM were stimulated with heme or with ATP. We showed lower  
310 levels of IL-1 $\beta$  release in M2 compared to M1 hMDM in response to both heme and ATP (Figure  
311 1D). In response to heme, M1 macrophages underwent cell death with a necrotic morphology. In  
312 contrast, M2 macrophages remained viable with an intact plasma membrane but they appeared  
313 more flattened and granular than the unstimulated cells (Figure 1E). Together, these results  
314 suggest that SCD macrophages have increased inflammatory caspase activity, resulting in  
315 increased IL-1 $\beta$  activation and that this may be due, in part, to the increased proportion of M1  
316 macrophage population in patients with SCD.

317

### 318 ***Caspase-1, caspase-4, and caspase-5 are activated by heme in the absence of priming***

319 Given that heme induces IL-1 $\beta$  release in macrophages, we next investigated the ability of heme  
320 to activate caspase-1 and the other human inflammatory caspases, caspase-4 and caspase-5.  
321 Caspase-1 is activated upon proximity-induced dimerization following recruitment to  
322 inflammasomes (1, 37). The recruitment of caspase-1 to an inflammasome is mediated by  
323 interactions between specific protein interaction domains in the inflammasome proteins. The  
324 caspase recruitment domain (CARD) in ASC or in NLR family CARD containing 4 (NLRC4) binds  
325 to the CARD in the prodomain of caspase-1 to recruit it to the inflammasome and facilitate induced  
326 proximity of the caspase (38, 39). To measure the induced proximity of each caspase, we used



327 caspase bimolecular fluorescence complementation (BiFC) (40). BiFC uses non-fluorescent  
328 fragments of the yellow fluorescent protein, Venus (“split Venus”) that can associate to reform the  
329 fluorescent Venus complex when fused to interacting proteins (41). When the CARD-containing  
330 prodomain of caspase-1 is fused to each half of split Venus, recruitment of caspase-1 to  
331 inflammasomes, and the subsequent induced proximity results in enforced association of the two  
332 Venus halves (27). Thus, Venus fluorescence (BiFC) acts as a read-out for caspase induced  
333 proximity, the proximal step for activation. We transiently expressed the prodomain of caspase-1  
334 (C1-Pro, aa 1-102) fused to each of the split Venus fragments, Venus C (aa 155-239) and Venus  
335 N (aa 1-173) in hMDM (Figure 2A). Following exposure to heme, we noted a significant increase  
336 in the proportion of cells that became Venus positive. Surprisingly, and unlike the requirement for  
337 IL-1 $\beta$  release, this induction of caspase-1 BiFC did not require prior priming with LPS. When we  
338 transfected macrophages with the caspase-4 prodomain (C4-Pro) or caspase-5 prodomain (C5-  
339 Pro) BiFC pairs, we observed a similar pattern, where caspase-4 and caspase-5 BiFC were  
340 induced by heme, independent of LPS priming (Figure 2B,C). This suggests that caspase-1,  
341 caspase-4, and caspase-5 are each activated by heme in macrophages. When we analyzed the  
342 appearance and localization of the fluorescent complexes produced by heme in each case, we  
343 noticed some differences (Figure 2D). The caspase-1 complex appeared as a single green  
344 punctum typical of ASC specks and of ASC-induced caspase-1 BiFC that we previously reported  
345 (27, 42). Caspase-4 and caspase-5 BiFC appeared as a series of punctate spots located  
346 throughout the cytoplasm of the cell that did not co-localize with mitochondria. This indicates that  
347 there may be different mechanisms of action for caspase-1 compared to caspase-4 or caspase-  
348 5.

349

### 350 ***Caspase-5 activation is impaired in M2 macrophages***

351 Next, we used the BiFC system to measure inflammatory caspase activation in M1 and M2  
352 macrophages. We polarized macrophages into M1 and M2 as before and transfected donor-

353 matched M1 and M2 cells with each of the inflammatory caspase BiFC pairs. Following exposure  
354 to heme, caspase-1, caspase-4, and caspase-5 BiFC was increased as before in M1 hMDM  
355 (Figure 3A). Interestingly, while caspase-1 and caspase-4 BiFC was induced to the same extent  
356 in M1 and M2 macrophages, the M2 macrophages had impaired heme-induced caspase-5 BiFC.  
357 To explore this further, we measured caspase-1, caspase-4, and caspase-5 expression in M1  
358 and M2 macrophages by immunoblot (Figure 3B). Endogenous caspase-1 and caspase-4 were  
359 similarly expressed in both subtypes and their expression was unchanged with the addition of  
360 heme. Caspase-5 expression was readily detected in M1 macrophages, but was lowly expressed  
361 in unstimulated M2 macrophages. Heme did not induce caspase-5 expression in the M2  
362 subgroup, but pre-treatment with LPS restored the level of caspase-5 to the level detected in M1  
363 cells. We hypothesized that the low level of endogenous caspase-5 in M2 hMDM was responsible  
364 for the inability of these cells to induce caspase-5 BiFC. To test this, we compared caspase-5  
365 BiFC induced by heme in M1 and M2 hMDM with and without LPS priming. Priming of M2  
366 macrophages with LPS restored their ability to induce the caspase-5 BiFC complex (Figure 3C).  
367 This suggests that full length endogenous caspase-5 is required to form the caspase-5 activation  
368 complex in response to heme.

369

370 ***Heme activates caspase-4 and caspase-5 independently of canonical inflammasome***  
371 ***interactions***

372 Intracellular LPS has been shown to bind and induce oligomerization of caspase-4, caspase-5,  
373 or caspase-11 independently of inflammasomes (19). The oligomerization is mediated by CARD  
374 clustering, which leads to induced proximity and caspase dimerization. Since heme can promote  
375 caspase-4 and caspase-5 induced proximity and is naturally taken up and recycled by  
376 macrophages, we reasoned that heme may represent an intracellular trigger for non-canonical  
377 inflammatory caspase activation (activation independent of known inflammasomes). To test this,  
378 we investigated if heme-induced caspase activation requires interactions with inflammasomes.

379 Recruitment of caspases to inflammasomes is dependent on an intact CARD. The aspartate  
380 residue (D59) in caspase-1 is essential for the ASC-caspase-1 interaction and mutation of this  
381 D59 residue blocks ASC-induced caspase-1 BiFC (27, 43). We previously showed that ASC  
382 overexpression does not induce caspase-4 or caspase-5 BiFC but NLRC4 does (27). We modified  
383 the conserved CARD-binding residue found in caspase-4 (D59) and caspase-5 (D117), and  
384 showed that disruption of this residue also blocked caspase-4 and caspase-5 BiFC triggered by  
385 overexpressed NLRC4 (Supplemental Figure S1A, B). Using the CARD-disrupting mutant in  
386 caspase-1 (D59R), caspase-4 (D59R), and caspase-5 (D117R), we tested if heme-induced  
387 inflammatory caspase BiFC is independent of canonical inflammasome interactions. We  
388 transfected hMDM with the caspase-1, caspase-4 or caspase-5 Pro BiFC pairs or with the  
389 corresponding CARD-disrupting mutant BiFC pairs. Following exposure to heme, caspase-1  
390 (D59R) BiFC was significantly decreased compared to the wild type caspase-1 reporter (Figure  
391 4A). This indicates that heme triggers recruitment of caspase-1 to the inflammasome for its  
392 subsequent activation. In contrast, heme-induced caspase-4 and caspase-5 BiFC was not  
393 changed when the CARD mutant BiFC reporters were expressed (Figure 4A). This suggests that  
394 heme activates caspase-4 and caspase-5 independently of canonical inflammasome interactions.  
395

396 To confirm these results, we used siRNA to silence NLRP3, the inflammasome receptor that has  
397 been shown to be required for heme-induced caspase-1 activation (6). We similarly silenced the  
398 inflammasome adaptor protein ASC. ASC is essential to the assembly of most characterized  
399 inflammasomes including the NLRP1, NLRP3, and AIM2 inflammasomes (1). It has been shown  
400 to be dispensable for the NLRC4 inflammasome, but ASC enhances NLRC4 inflammasome  
401 activity (44, 45). Therefore, if heme induces inflammatory caspase activation via the NLRP3 or  
402 alternative inflammasome complex, loss of ASC is predicted to block this activity. Si-RNA-  
403 mediated silencing of both NLRP3 and ASC in hMDM reduced heme-induced caspase-1 BiFC to  
404 background levels (Figure 4B, C Supplemental Figure S1C). In contrast, NLRP3 or ASC depletion

405 had no effect on the levels of caspase-4 or caspase-5 BiFC induced by heme (Figure 4B, C).  
406 Together, these results show that caspase-4 and caspase-5 are activated by heme independently  
407 of canonical inflammasomes.

408

409 ***Heme-induced cytokine release is dependent on caspase-4 and caspase-5***

410 Having identified caspase-4 and caspase-5 induced proximity following heme exposure, we set  
411 out to explore the functional outcomes of this mechanism. We used CRISPR/Cas9 to delete  
412 caspase-4 and caspase-5 from the monocytic THP-1 cell line. We compared caspase-4 and  
413 caspase-5-deficient cells to parental THP-1 cells and to caspase-1 deficient THP-1 cells  
414 (purchased from Invivogen). To most closely represent the M1 phenotype of primary  
415 macrophages, cells were first treated with PMA followed by incubation with IFN $\gamma$  and a low  
416 concentration of LPS (10 pg/mL) to polarize them to an M1-like state (31). The cells were then  
417 primed for 3 h with a higher concentration of LPS (100 pg/mL) followed by exposure to heme for  
418 a 1 h pulse. IL-1 $\beta$  release was induced by heme in LPS-primed M1 THP-1 cells to a similar level  
419 as we observed in M1 hMDM (~80 pg/mL). As expected, caspase-1 deficiency completely blocked  
420 the release. Deficiency of either caspase-4 or caspase-5 potentially blocked heme-induced IL-1 $\beta$   
421 release. These results show that both caspase-4 and caspase-5 are required for IL-1 $\beta$  release  
422 induced by heme and that one caspase does not functionally replace for the action of the other.

423

424 Caspase-1, caspase-4, and caspase-5 have been shown to cleave GSDMD (18), the proposed  
425 mechanism by which inflammatory caspases induce both pyroptosis and release of mature  
426 cytokines. We therefore investigated GSDMD cleavage in M1 polarized THP-1 cells. In cells  
427 primed with LPS followed by exposure to heme, we did not detect levels of cleaved GSDMD over  
428 background in the cell lysates but we did detect it in the cellular supernatants (Figure 5B, lane 5).  
429 This is consistent with reports that N terminal of GSDMD (GSDMD-N) is released from cells when  
430 it is cleaved (21, 22). The amount of GSDMD-N that was produced by heme in LPS-primed cells

431 was considerably lower than that of the positive control nigericin, a bacterial potassium ionophore  
432 and potent inducer of the NLRP3 inflammasome (Figure 5B, lane 6) (46, 47). Caspase-1  
433 deficiency did not reduce the amount of GSDMD-N produced by heme treatment. In cells deficient  
434 in caspase-4, the amount of GSDMD-N detected in the cellular supernatant was lower compared  
435 to wild type cells but there was more detected in the lysate of heme treated LPS-primed cells. In  
436 cells deficient in caspase-5, a slight reduction in GSDMD-N was evident in supernatant.  
437 Therefore, the cleavage of GSDMD was not completely blocked in the absence of either caspase.  
438 Cleavage of GSDMD was not noticeably impaired in any of the caspase-deficient cells treated  
439 with nigericin. Together these results suggest that there is redundancy between caspase-4 and  
440 caspase-5 with respect to GSDMD cleavage. We also probed for IL-1 $\beta$  in the lysates and  
441 supernatants of each cell line. We were not able to detect the p17 IL-1 $\beta$  fragment in either fraction,  
442 but we detected a larger intermediate fragment running at around 25 kD in the supernatants of  
443 LPS-primed M1 THP-1 cells treated with heme. Production of this fragment was blocked in  
444 caspase-4 deficient and caspase-5 deficient cells and substantially reduced in the caspase-1  
445 deficient cells. This is consistent with the reduction of IL-1 $\beta$  release detected by ELISA in these  
446 cells in Figure 5A. Importantly, the fact that we can still detect GSDMD-N in the heme-treated  
447 caspase-4 and caspase-5 deficient cells but IL-1 $\beta$  release is blocked in both of these cell types  
448 suggests that caspase-4 and caspase-5 have roles in regulating caspase-1 that are independent  
449 of GSDMD cleavage.

450

#### 451 ***Heme-induced cell death is mediated in part by caspase-4***

452 When we probed the cells in Figure 5B for pro-IL-1 $\beta$ , we noted a higher amount of pro-IL-1 $\beta$  in  
453 the lysates of caspase-4 deficient cells compared to wild type, caspase-5 deficient, or caspase-1  
454 deficient cells. We reasoned that this may be due to the cells being protected from cell death in  
455 the absence of caspase-4. In addition, in the caspase-1 deficient cells treated with heme, all of  
456 the pro-IL-1 $\beta$  was detected in the supernatant and not the lysate suggesting cell lysis. This

457 suggested that loss of caspase-1 has minimal effects on heme-induced cell death. To investigate  
458 the requirement of each caspase for heme-induced cell death, we first determined the level of  
459 death that was caspase-dependent. We treated LPS-primed or unprimed THP-1 cells with heme  
460 in the presence or absence of the pan-caspase inhibitor qVD-OPH (Figure 6A). Heme treatment  
461 of both primed and unprimed THP-1 cells induced substantial cell death as measured by 7-AAD  
462 uptake. Caspase inhibition significantly blocked this death but, notably, the reduction in cell death  
463 was not complete and approximately 30% of the cells were killed by heme in a caspase-  
464 independent manner. To determine the specific contribution of each inflammatory caspase to this  
465 death, we measured heme-induced cell death in caspase-1, caspase-4, and caspase-5-deficient  
466 THP-1 cells compared to wild type THP-1 cells. We measured cell death at two time points: an  
467 early time point at 6 h and a later time point at 20 h. At 6 h, heme did not induce a significant  
468 amount of death above background and there was no significant difference in the amount of death  
469 induced in the caspase-deficient cell lines (Figure 6B). At the 20 h time point, loss of caspase-4  
470 significantly decreased heme-induced cell death, while loss of caspase-1 or caspase-5 had no  
471 effect (Figure 6C). This suggests that, among the inflammatory caspases, heme-induced  
472 caspase-4 activation is the primary effector of heme-induced cell death. Similar to the effect of  
473 total caspase inhibition, caspase-4 loss did not completely block the death and approximately  
474 50% of the cells still died. This confirms that caspase-independent cell death mechanisms also  
475 contribute to heme-induced cell death.

476  
477 To investigate the kinetics of heme-induced caspase-1 activation relative to cell death, we used  
478 time-lapse confocal microscopy. For this, we generated THP-1 cells stably expressing the  
479 caspase-1 pro BiFC components. We designed a bicistronic construct, where the caspase-1 Pro-  
480 VC and caspase-1 Pro-VN are expressed in a single vector separated by the viral 2A self-cleaving  
481 peptide, similar to a caspase-2 reporter we previously described (48). This design ensures that  
482 the caspase-1 BiFC components are expressed at equal levels because they are translated from

483 a single mRNA transcript. These cells also express a linked mCherry gene as a reporter for  
484 expression of the BiFC components. In addition, loss of mCherry fluorescence can be used to  
485 detect cell lysis. The caspase-1 BiFC complex was detected approximately 18 h following the  
486 addition of heme and its appearance was followed by lysis of the cell that was detected by loss of  
487 the mCherry protein upon cell rupture (Figure 6A, Supplemental Movie S1). Cell death occurred  
488 within 5 minutes of detection of the C1-Pro BiFC complex (Figure 6B). Thus, recruitment of  
489 caspase-1 to inflammasomes in response to heme immediately precedes cell death. It is  
490 important to note that this death occurred in the presence of the pan-caspase inhibitor qVD-OPH.  
491 The inclusion of qVD-OPH in the time-lapse experiment was to prevent apoptotic cell death that  
492 causes the cells to lift off the coverslip and impairs imaging as the cells move out of the focal  
493 plane. This, together with the results from Figure 6A suggests that there is a substantial caspase-  
494 independent component to heme-induced cell death. However, the close timing of caspase-1  
495 recruitment to inflammasomes and cell lysis indicates that these events are mechanistically  
496 linked, which could imply that caspases contribute to the death in a manner that does not require  
497 their catalytic activity.

498 **Discussion**

499 Our data show that heme activates caspase-1, caspase-4, and caspase-5. However, there are  
500 significant differences in the upstream requirements for activation, the localization of the activation  
501 complexes and the outcomes of activation of each caspase. We found that both caspase-4 and  
502 caspase-5, are required for heme-induced IL-1 $\beta$  release, while caspase-4 is the primary  
503 contributor to heme-induced cell death. Our results indicate that caspase-4 and caspase-5 have  
504 non-overlapping functions in heme-induced inflammation and caspase-1 activation. Together,  
505 these data underscore the important functions of inflammatory caspases in heme-induced sterile  
506 inflammation.

507

508 While SCD is primarily a disease characterized by anemia, many of its clinical complications are  
509 exacerbated by chronic inflammation. Sickle shaped red blood cells are more prone to hemolysis  
510 releasing excess heme into the blood stream that overwhelms the body's heme scavenging  
511 systems. Consistent with this, we noted that heme-treated macrophages derived from patients  
512 with SCD released more IL-1 $\beta$  when compared to healthy controls. This suggests that SCD  
513 macrophages are more sensitive to heme-induced inflammation. Using peripheral blood  
514 mononuclear cell transcriptome profiles of patients with SCD compared to healthy controls, van  
515 Beers *et al* showed that the SCD cohort had higher expression of many markers of innate  
516 immunity including *TLR4*, *NLRP3*, *NLRC4*, *CASP1*, *IL-1* and *IL-18* (49). They also showed a  
517 positive correlation between *TLR4* expression and *IL-6* expression in SCD cells. Lanaro *et al*  
518 showed increased expression of *TNF $\alpha$*  and *IL-8* in SCD mononuclear cells (50). Because heme  
519 can activate TLR4 and, in turn, the transcription factor NF $\kappa$ B that controls transcription of many  
520 of these cytokines and proteins, it is likely that a lifetime exposure to heme in patients with SCD  
521 resulting from higher rates of hemolysis contributes to these elevated levels. We originally  
522 suspected that the increased IL-1 $\beta$  release we detected from SCD macrophages after heme  
523 exposure would be due to this lifetime exposure to heme, which would prime the cells for



524 inflammasome activation by inducing expression of pro-IL-1 $\beta$  and other inflammasome  
525 components. However, heme alone was insufficient to trigger IL-1 $\beta$  release in macrophages from  
526 patients with SCD or from healthy donors indicating that an extra priming step is still required.  
527 Monocytes from patients with SCD have been shown to have increased levels of the macrophage  
528 markers CD14 and CD11b (14). In addition, liver macrophages from HbS sickle mice had  
529 increased surface expression of the M1 macrophage markers CD86, MHCII, iNOS, and IL-6 (11).  
530 This suggests that sickle macrophages are likely to skew to the M1-like pro-inflammatory  
531 phenotype. Treatment of HbS sickle mice with the heme scavenger hemopexin reverted the M1  
532 polarization, indicating that heme is the inducer of M1 polarization (11). Thus, we propose that  
533 the increased proportion of activated and pro-inflammatory M1 macrophages in patients with SCD  
534 is the reason why the cells, once primed by LPS, are more sensitive to heme-induced IL-1 $\beta$   
535 release rather than the effect of heme priming. Interestingly, heme alone was sufficient to induce  
536 caspase-1, caspase-4, and caspase-5 activation. Caspase-1 activation by heme has been  
537 reported to be dependent on the NLRP3 inflammasome (6) and we confirmed that observation  
538 here. Unlike the other inflammasome receptors, NLRP3 requires a priming step for activation (51,  
539 52). Our results may suggest that heme can prime for NLRP3 expression, but does not provide  
540 enough of a priming signal to induce sufficient pro-IL-1 $\beta$  expression. Induction of NLRP3  
541 expression has been shown to be dependent on reactive oxygen species (ROS) (8). Heme  
542 induces ROS and blocking ROS has been shown to inhibit both caspase-1 cleavage and IL-1 $\beta$   
543 processing (6). Therefore, heme-induced ROS generation may be a mechanism by which heme  
544 can prime for NLRP3 expression but not for pro-IL-1 $\beta$  expression.

545

546 Our observation that heme-induced caspase-4 and caspase-5 induced proximity does not require  
547 LPS priming could be explained in one of two ways. Similar to caspase-1, heme may be sufficient  
548 to prime the cells for caspase activation. However, we also show that, in contrast to caspase-1,  
549 caspase-4 and caspase-5 induced proximity is activated by heme independently of CARD-

550 inflammasome interactions and of the common inflammasome proteins NLRP3 and ASC. The  
551 lack of a priming requirement for caspase-4 and caspase-5 induced proximity is consistent with  
552 caspase activation that does not require an additional upstream receptor. Caspase-5 is lowly  
553 expressed in many cell types and its expression is induced by LPS and interferon (53). Despite  
554 this, primary M1-polarized macrophages express abundant caspase-5. M2 macrophages have  
555 reduced caspase-5 expression and display reduced caspase-5 induced proximity in response to  
556 heme. This observation may suggest that full length, endogenous caspase-5 is required to  
557 promote assembly of the caspase-5 signaling platform. Indeed, when we reconstituted caspase-  
558 5 expression in M2 macrophages, we were able to restore the levels of caspase-5 induced  
559 proximity. These results are consistent with studies that have shown that caspase-4 and caspase-  
560 5 are direct intracellular receptors for LPS (19). LPS binds to the CARD in these caspases to  
561 trigger oligomerization of caspase-4 or caspase-5 in the absence of any known inflammasome  
562 protein. Our data indicate that heme acts in an analogous fashion to induce caspase-4 or  
563 caspase-5 oligomerization either directly or through an as yet unidentified cytosolic mediator.  
564 Contrary to the report that LPS binding to caspase-4 or caspase-5 is CARD-mediated (19), our  
565 results suggest that full length caspase-5 is required for its scaffolding function because the BiFC  
566 construct contains only the CARD-containing prodomain, which is insufficient in the absence of  
567 endogenous caspase-5. Further supporting a mechanistic difference between heme-induced  
568 caspase-1 activation and heme-induced caspase-4 or caspase-5 activation, we observed  
569 differences in the size and localization of the caspase-4 and caspase-5 signaling complexes  
570 induced by heme compared to the single ASC-like speck observed for caspase-1. Heme is  
571 naturally taken up and recycled by macrophages (44), representing a physiological stimulus and,  
572 importantly, a trigger of sterile inflammation that directly engages caspase-4 and caspase-5.  
573 Thus, heme acts as a canonical stimulus by engaging inflammasome-dependent caspase-1  
574 activation, and also as a non-canonical stimulus by activating caspase-4 and caspase-5  
575 independent of canonical inflammasomes.

576

577 Caspase-4 and caspase-5 are often assumed to be redundant proteins that directly phenocopy  
578 caspase-11 in mice. Studies using a transgenic mouse generated to express human caspase-4  
579 indicated that caspase-4 does not completely phenocopy caspase-11 and a recent study showed  
580 a broader reactivity of caspase-4 to LPS compared to caspase-11 (54, 55). In addition, humans  
581 are more sensitive to endotoxemia than rodents (40). These studies highlight the important  
582 variations between the human and murine innate immune response and suggest that the  
583 presence of an additional inflammatory caspase in humans may contribute to these differences.  
584 We show that caspase-4 and caspase-5 are both required for heme-induced IL-1 $\beta$  release,  
585 providing evidence of a co-operative regulation between these two caspases and caspase-1  
586 rather than a redundant function, where one can replace for the other. In contrast, loss of caspase-  
587 4 or caspase-5 on their own only marginally reduced GSDMD cleavage. This suggests some  
588 redundancy of these caspases for GSDMD cleavage. Therefore, the ability of caspase-4 or  
589 caspase-5 to mediate IL-1 $\beta$  release cannot be explained by inhibition of GSDMD cleavage by  
590 either caspase. Caspase-11 has been proposed to regulate caspase-1 (56), but the exact  
591 mechanism of this is unclear. Further work is needed to determine how caspase-4 and caspase-  
592 5 cooperate to regulate caspase-1 activation in response to heme and other stimuli.

593

594 Despite the similar effects on GSDMD cleavage, caspase-5 did not impact cell death induced by  
595 heme in the same manner as caspase-4. This suggests that while caspase-4 and caspase-5 both  
596 contribute to GSDMD cleavage, caspase-4 is the main effector of cell death. Indeed, studies have  
597 shown IL-1 $\beta$  release from live macrophages indicating that the pore formed by GSDMD and  
598 pyroptosis are separable events (25, 26). The caspase-4-dependent death we observed that is  
599 induced by heme may even be independent of GSDMD, suggesting caspase-4-specific  
600 substrates that promote cell death. However, there is still a considerable amount of caspase-  
601 independent death that is induced by heme. These results suggest that additional death

602 mechanisms are engaged by heme. Heme has been shown to induce RIPK3-dependent necrosis  
603 (57) and, therefore, this may be a contributing mechanism to the death we observed. RIPK3-  
604 dependent necrosis has been shown to limit pathogenic inflammation and associated tissue  
605 damage without impairing IL-1 $\beta$  release (58). Given that cell death occurs immediately following  
606 detection of the caspase-1 activation platform, it is possible that a similar mechanism occurs here,  
607 where the cell lysis is a result of concurrent activation of the RIPK3 pathway rather than caspase-  
608 dependent effects. Since K<sup>+</sup> efflux is known to be necessary for NLRP3-induced caspase-1  
609 activation (47), another explanation could be that the close timing of caspase-1 induced proximity  
610 and cell lysis indicates that caspase-1 is oligomerizing in response to early potassium efflux  
611 through a caspase-4/5-driven pore. The exact interplay between caspase-1 activation and  
612 caspase-4/-5 activation that is triggered by exposure to heme, and how this leads to cell death is  
613 something that requires further study.

614

615 The role of caspase-4 in heme-induced cell death may suggest that caspase-4 is a key contributor  
616 to tissue damage in humans. The association between caspase-11, excess pyroptosis, and  
617 inflammation-associated tissue damage is well established (56, 59). In a mouse model of SCD,  
618 the consequences of heme-induced inflammation is tissue damage that manifests as vaso-  
619 occlusion and death (7). Our results suggest that caspase-4, and not caspase-1 or caspase-5, is  
620 the primary contributor to heme-induced pyroptosis. Our model predicts that blocking caspase-4  
621 would protect from tissue damage, while blocking caspase-1, caspase-4, or caspase-5 would  
622 protect from uncontrolled inflammation (fever, pain, etc.). Further exploration of the distinct roles  
623 of these caspases is required to fully understand how chronic inflammation can be controlled in  
624 hemolytic disorders.

625 **Acknowledgements**

626 We thank the members of LBH's lab past and present for helpful discussions and careful reading  
627 of the manuscript. We thank Doug Green and the members of his lab for valuable suggestions.  
628 This project was supported by the Cytometry and Cell Sorting Core at Baylor College of Medicine  
629 with the assistance of Joel M. Sederstrom.

630 **References**

- 631 1. Bolivar, B. E., T. P. Vogel, and L. Bouchier-Hayes. 2019. Inflammatory caspase regulation:  
632 maintaining balance between inflammation and cell death in health and disease. *FEBS J*  
633 286: 2628-2644.
- 634 2. van de Veerdonk, F. L., M. G. Netea, C. A. Dinarello, and L. A. Joosten. 2011.  
635 Inflammasome activation and IL-1beta and IL-18 processing during infection. *Trends*  
636 *Immunol* 32: 110-116.
- 637 3. Rock, K. L., E. Latz, F. Ontiveros, and H. Kono. 2010. The sterile inflammatory response.  
638 *Annual review of immunology* 28: 321-342.
- 639 4. Martin, S. J. 2016. Cell death and inflammation: the case for IL-1 family cytokines as the  
640 canonical DAMPs of the immune system. *FEBS J* 283: 2599-2615.
- 641 5. Wagener, F. A., A. Eggert, O. C. Boerman, W. J. Oyen, A. Verhofstad, N. G. Abraham, G.  
642 Adema, Y. van Kooyk, T. de Witte, and C. G. Figdor. 2001. Heme is a potent inducer of  
643 inflammation in mice and is counteracted by heme oxygenase. *Blood* 98: 1802-1811.
- 644 6. Dutra, F. F., L. S. Alves, D. Rodrigues, P. L. Fernandez, R. B. de Oliveira, D. T. Golenbock,  
645 D. S. Zamboni, and M. T. Bozza. 2014. Hemolysis-induced lethality involves  
646 inflammasome activation by heme. *Proc Natl Acad Sci U S A* 111: E4110-4118.
- 647 7. Belcher, J. D., C. Chen, J. Nguyen, L. Milbauer, F. Abdulla, A. I. Alayash, A. Smith, K. A.  
648 Nath, R. P. Hebbel, and G. M. Vercellotti. 2014. Heme triggers TLR4 signaling leading to  
649 endothelial cell activation and vaso-occlusion in murine sickle cell disease. *Blood* 123:  
650 377-390.
- 651 8. Bauernfeind, F., E. Bartok, A. Rieger, L. Franchi, G. Nunez, and V. Hornung. 2011. Cutting  
652 edge: reactive oxygen species inhibitors block priming, but not activation, of the NLRP3  
653 inflammasome. *J Immunol* 187: 613-617.
- 654 9. Prevention, C. f. D. C. a. 2017. Sickle Cell Disease. Available from:  
655 [www.cdc.gov/ncbddd/sicklecell/data.html](http://www.cdc.gov/ncbddd/sicklecell/data.html).
- 656 10. Al-Jafar, H. 2017. Sickle Cell Disease Clinical Classification. *Blood* 130: 4771.
- 657 11. Vinchi, F., M. Costa da Silva, G. Ingoglia, S. Petrillo, N. Brinkman, A. Zuercher, A.  
658 Cerwenka, E. Tolosano, and M. U. Muckenthaler. 2016. Hemopexin therapy reverts heme-  
659 induced proinflammatory phenotypic switching of macrophages in a mouse model of sickle  
660 cell disease. *Blood* 127: 473-486.
- 661 12. Vinchi, F., L. De Franceschi, A. Ghigo, T. Townes, J. Cimino, L. Silengo, E. Hirsch, F.  
662 Altruda, and E. Tolosano. 2013. Hemopexin therapy improves cardiovascular function by  
663 preventing heme-induced endothelial toxicity in mouse models of hemolytic diseases.  
664 *Circulation* 127: 1317-1329.
- 665 13. Ghosh, S., O. A. Adisa, P. Chappa, F. Tan, K. A. Jackson, D. R. Archer, and S. F. Ofori-  
666 Acquah. 2013. Extracellular heme crisis triggers acute chest syndrome in sickle mice. *The*  
667 *Journal of clinical investigation* 123: 4809-4820.
- 668 14. Belcher, J. D., P. H. Marker, J. P. Weber, R. P. Hebbel, and G. M. Vercellotti. 2000.  
669 Activated monocytes in sickle cell disease: potential role in the activation of vascular  
670 endothelium and vaso-occlusion. *Blood* 96: 2451-2459.
- 671 15. Safaya, S., M. H. Steinberg, and E. S. Klings. 2012. Monocytes from sickle cell disease  
672 patients induce differential pulmonary endothelial gene expression via activation of NF-  
673 kappaB signaling pathway. *Molecular immunology* 50: 117-123.
- 674 16. Carvalho, M. O. S., T. Araujo-Santos, J. H. O. Reis, L. C. Rocha, B. A. V. Cerqueira, N.  
675 F. Luz, I. M. Lyra, V. M. Lopes, C. G. Barbosa, L. M. Fiuza, R. P. Santiago, C. V. B.  
676 Figueiredo, C. C. da Guarda, M. Barral Neto, V. M. Borges, and M. S. Goncalves. 2018.  
677 Inflammatory mediators in sickle cell anaemia highlight the difference between steady  
678 state and crisis in paediatric patients. *British journal of haematology* 182: 933-936.

- 679 17. Kayagaki, N., I. B. Stowe, B. L. Lee, K. O'Rourke, K. Anderson, S. Warming, T. Cuellar,  
680 B. Haley, M. Roose-Girma, Q. T. Phung, P. S. Liu, J. R. Lill, H. Li, J. Wu, S. Kummerfeld,  
681 J. Zhang, W. P. Lee, S. J. Snipas, G. S. Salvesen, L. X. Morris, L. Fitzgerald, Y. Zhang,  
682 E. M. Bertram, C. C. Goodnow, and V. M. Dixit. 2015. Caspase-11 cleaves gasdermin D  
683 for non-canonical inflammasome signalling. *Nature* 526: 666-671.
- 684 18. Shi, J., Y. Zhao, K. Wang, X. Shi, Y. Wang, H. Huang, Y. Zhuang, T. Cai, F. Wang, and  
685 F. Shao. 2015. Cleavage of GSDMD by inflammatory caspases determines pyroptotic cell  
686 death. *Nature* 526: 660-665.
- 687 19. Shi, J., Y. Zhao, Y. Wang, W. Gao, J. Ding, P. Li, L. Hu, and F. Shao. 2014. Inflammatory  
688 caspases are innate immune receptors for intracellular LPS. *Nature* 514: 187-192.
- 689 20. Ruan, J., S. Xia, X. Liu, J. Lieberman, and H. Wu. 2018. Cryo-EM structure of the  
690 gasdermin A3 membrane pore. *Nature* 557: 62-67.
- 691 21. Sborgi, L., S. Ruhl, E. Mulvihill, J. Pipercevic, R. Heilig, H. Stahlberg, C. J. Farady, D. J.  
692 Muller, P. Broz, and S. Hiller. 2016. GSDMD membrane pore formation constitutes the  
693 mechanism of pyroptotic cell death. *EMBO J* 35: 1766-1778.
- 694 22. Liu, X., Z. Zhang, J. Ruan, Y. Pan, V. G. Magupalli, H. Wu, and J. Lieberman. 2016.  
695 Inflammasome-activated gasdermin D causes pyroptosis by forming membrane pores.  
696 *Nature* 535: 153-158.
- 697 23. Aglietti, R. A., A. Estevez, A. Gupta, M. G. Ramirez, P. S. Liu, N. Kayagaki, C. Ciferri, V.  
698 M. Dixit, and E. C. Dueber. 2016. GsdmD p30 elicited by caspase-11 during pyroptosis  
699 forms pores in membranes. *Proc Natl Acad Sci U S A* 113: 7858-7863.
- 700 24. Cullen, S. P., C. J. Kearney, D. M. Clancy, and S. J. Martin. 2015. Diverse Activators of  
701 the NLRP3 Inflammasome Promote IL-1beta Secretion by Triggering Necrosis. *Cell Rep*  
702 11: 1535-1548.
- 703 25. Conos, S. A., K. E. Lawlor, D. L. Vaux, J. E. Vince, and L. M. Lindqvist. 2016. Cell death  
704 is not essential for caspase-1-mediated interleukin-1beta activation and secretion. *Cell*  
705 *Death Differ* 23: 1827-1838.
- 706 26. Evavold, C. L., J. Ruan, Y. Tan, S. Xia, H. Wu, and J. C. Kagan. 2018. The Pore-Forming  
707 Protein Gasdermin D Regulates Interleukin-1 Secretion from Living Macrophages.  
708 *Immunity* 48: 35-44 e36.
- 709 27. Sanders, M. G., M. J. Parsons, A. G. Howard, J. Liu, S. R. Fassio, J. A. Martinez, and L.  
710 Bouchier-Hayes. 2015. Single-cell imaging of inflammatory caspase dimerization reveals  
711 differential recruitment to inflammasomes. *Cell Death Dis* 6: e1813.
- 712 28. Riedhammer, C., D. Halbritter, and R. Weissert. 2016. Peripheral Blood Mononuclear  
713 Cells: Isolation, Freezing, Thawing, and Culture. *Methods in molecular biology (Clifton,*  
714 *N.J.)* 1304: 53-61.
- 715 29. Gundry, M. C., L. Brunetti, A. Lin, A. E. Mayle, A. Kitano, D. Wagner, J. I. Hsu, K. A.  
716 Hoegenauer, C. M. Rooney, M. A. Goodell, and D. Nakada. 2016. Highly Efficient Genome  
717 Editing of Murine and Human Hematopoietic Progenitor Cells by CRISPR/Cas9. *Cell*  
718 *reports* 17: 1453-1461.
- 719 30. Moreno-Mateos, M. A., C. E. Vejnar, J. D. Beaudoin, J. P. Fernandez, E. K. Mis, M. K.  
720 Khokha, and A. J. Giraldez. 2015. CRISPRscan: designing highly efficient sgRNAs for  
721 CRISPR-Cas9 targeting in vivo. *Nature methods* 12: 982-988.
- 722 31. Genin, M., F. Clement, A. Fattaccioli, M. Raes, and C. Michiels. 2015. M1 and M2  
723 macrophages derived from THP-1 cells differentially modulate the response of cancer  
724 cells to etoposide. *BMC cancer* 15: 577.
- 725 32. Bunn, H. F., and J. H. Jandl. 1968. Exchange of heme among hemoglobins and between  
726 hemoglobin and albumin. *The Journal of biological chemistry* 243: 465-475.
- 727 33. Balla, J., H. S. Jacob, G. Balla, K. Nath, J. W. Eaton, and G. M. Vercellotti. 1993.  
728 Endothelial-cell heme uptake from heme proteins: induction of sensitization and

- 729 desensitization to oxidant damage. *Proceedings of the National Academy of Sciences* 90:  
730 9285.
- 731 34. Adams, P. A., and M. C. Berman. 1980. Kinetics and mechanism of the interaction  
732 between human serum albumin and monomeric haemin. *Biochem J* 191: 95-102.
- 733 35. Kanno, T., K. Yasutake, K. Tanaka, S. Hadano, and J. E. Ikeda. 2017. A novel function of  
734 N-linked glycoproteins, alpha-2-HS-glycoprotein and hemopexin: Implications for small  
735 molecule compound-mediated neuroprotection. *PLoS One* 12: e0186227.
- 736 36. Vinchi, F., M. Costa da Silva, G. Ingoglia, S. Petrillo, N. Brinkman, A. Zuercher, A.  
737 Cerwenka, E. Tolosano, and M. U. Muckenthaler. 2016. Hemopexin therapy reverts heme-  
738 induced proinflammatory phenotypic switching of macrophages in a mouse model of sickle  
739 cell disease. *Blood* 127: 473-486.
- 740 37. Aaronson, D. S., and C. M. Horvath. 2002. A road map for those who don't know JAK-  
741 STAT. *Science* 296: 1653-1655.
- 742 38. Poyet, J. L., S. M. Srinivasula, M. Tnani, M. Razmara, T. Fernandes-Alnemri, and E. S.  
743 Alnemri. 2001. Identification of Ipaf, a human caspase-1-activating protein related to Apaf-  
744 1. *J Biol Chem* 276: 28309-28313.
- 745 39. Srinivasula, S. M., J. L. Poyet, M. Razmara, P. Datta, Z. Zhang, and E. S. Alnemri. 2002.  
746 The PYRIN-CARD protein ASC is an activating adaptor for caspase-1. *J Biol Chem* 277:  
747 21119-21122.
- 748 40. Bouchier-Hayes, L., A. Oberst, G. P. McStay, S. Connell, S. W. Tait, C. P. Dillon, J. M.  
749 Flanagan, H. M. Beere, and D. R. Green. 2009. Characterization of cytoplasmic caspase-  
750 2 activation by induced proximity. *Mol Cell* 35: 830-840.
- 751 41. Shyu, Y. J., H. Liu, X. Deng, and C. D. Hu. 2006. Identification of new fluorescent protein  
752 fragments for bimolecular fluorescence complementation analysis under physiological  
753 conditions. *Biotechniques* 40: 61-66.
- 754 42. Masumoto, J., S. Taniguchi, K. Ayukawa, H. Sarvotham, T. Kishino, N. Niikawa, E. Hidaka,  
755 T. Katsuyama, T. Higuchi, and J. Sagara. 1999. ASC, a novel 22-kDa protein, aggregates  
756 during apoptosis of human promyelocytic leukemia HL-60 cells. *J Biol Chem* 274: 33835-  
757 33838.
- 758 43. Proell, M., M. Gerlic, P. D. Mace, J. C. Reed, and S. J. Riedl. 2013. The CARD plays a  
759 critical role in ASC foci formation and inflammasome signalling. *Biochem J* 449: 613-621.
- 760 44. Broz, P., J. von Moltke, J. W. Jones, R. E. Vance, and D. M. Monack. 2010. Differential  
761 requirement for Caspase-1 autoproteolysis in pathogen-induced cell death and cytokine  
762 processing. *Cell host & microbe* 8: 471-483.
- 763 45. Mariathasan, S., K. Newton, D. M. Monack, D. Vucic, D. M. French, W. P. Lee, M. Roose-  
764 Girma, S. Erickson, and V. M. Dixit. 2004. Differential activation of the inflammasome by  
765 caspase-1 adaptors ASC and Ipaf. *Nature* 430: 213-218.
- 766 46. Pelegrin, P., and A. Surprenant. 2006. Pannexin-1 mediates large pore formation and  
767 interleukin-1beta release by the ATP-gated P2X7 receptor. *EMBO J* 25: 5071-5082.
- 768 47. Perregaux, D., J. Barberia, A. J. Lanzetti, K. F. Geoghegan, T. J. Carty, and C. A. Gabel.  
769 1992. IL-1 beta maturation: evidence that mature cytokine formation can be induced  
770 specifically by nigericin. *J Immunol* 149: 1294-1303.
- 771 48. Ando, K., M. J. Parsons, R. B. Shah, C. I. Charendoff, S. L. Paris, P. H. Liu, S. R. Fassio,  
772 B. A. Rohrman, R. Thompson, A. Oberst, S. Sidi, and L. Bouchier-Hayes. 2017. NPM1  
773 directs PIDDosome-dependent caspase-2 activation in the nucleolus. *J Cell Biol* 216:  
774 1795-1810.
- 775 49. van Beers, E. J., Y. Yang, N. Raghavachari, X. Tian, D. T. Allen, J. S. Nichols, L.  
776 Mendelsohn, S. Nekhai, V. R. Gordeuk, J. G. t. Taylor, and G. J. Kato. 2015. Iron,  
777 inflammation, and early death in adults with sickle cell disease. *Circulation research* 116:  
778 298-306.



- 779 50. Lanaro, C., C. F. Franco-Penteado, D. M. Albuquerque, S. T. Saad, N. Conran, and F. F.  
780 Costa. 2009. Altered levels of cytokines and inflammatory mediators in plasma and  
781 leukocytes of sickle cell anemia patients and effects of hydroxyurea therapy. *Journal of*  
782 *leukocyte biology* 85: 235-242.
- 783 51. Bauernfeind, F. G., G. Horvath, A. Stutz, E. S. Alnemri, K. MacDonald, D. Speert, T.  
784 Fernandes-Alnemri, J. Wu, B. G. Monks, K. A. Fitzgerald, V. Hornung, and E. Latz. 2009.  
785 Cutting edge: NF-kappaB activating pattern recognition and cytokine receptors license  
786 NLRP3 inflammasome activation by regulating NLRP3 expression. *J Immunol* 183: 787-  
787 791.
- 788 52. Franchi, L., T. Eigenbrod, and G. Nunez. 2009. Cutting edge: TNF-alpha mediates  
789 sensitization to ATP and silica via the NLRP3 inflammasome in the absence of microbial  
790 stimulation. *J Immunol* 183: 792-796.
- 791 53. Lin, X. Y., M. S. Choi, and A. G. Porter. 2000. Expression analysis of the human caspase-  
792 1 subfamily reveals specific regulation of the CASP5 gene by lipopolysaccharide and  
793 interferon-gamma. *J Biol Chem* 275: 39920-39926.
- 794 54. Lagrange, B., S. Benaoudia, P. Wallet, F. Magnotti, A. Provost, F. Michal, A. Martin, F. Di  
795 Lorenzo, B. F. Py, A. Molinaro, and T. Henry. 2018. Human caspase-4 detects tetra-  
796 acylated LPS and cytosolic Francisella and functions differently from murine caspase-11.  
797 *Nature communications* 9: 242.
- 798 55. Kajiwara, Y., T. Schiff, G. Voloudakis, M. A. Gama Sosa, G. Elder, O. Bozdagi, and J. D.  
799 Buxbaum. 2014. A critical role for human caspase-4 in endotoxin sensitivity. *J Immunol*  
800 193: 335-343.
- 801 56. Kayagaki, N., S. Warming, M. Lamkanfi, L. Vande Walle, S. Louie, J. Dong, K. Newton, Y.  
802 Qu, J. Liu, S. Heldens, J. Zhang, W. P. Lee, M. Roose-Girma, and V. M. Dixit. 2011. Non-  
803 canonical inflammasome activation targets caspase-11. *Nature* 479: 117-121.
- 804 57. Fortes, G. B., L. S. Alves, R. de Oliveira, F. F. Dutra, D. Rodrigues, P. L. Fernandez, T.  
805 Souto-Padron, M. J. De Rosa, M. Kelliher, D. Golenbock, F. K. Chan, and M. T. Bozza.  
806 2012. Heme induces programmed necrosis on macrophages through autocrine TNF and  
807 ROS production. *Blood* 119: 2368-2375.
- 808 58. Kitur, K., S. Wachtel, A. Brown, M. Wickersham, F. Paulino, H. F. Penalzoza, G. Soong, S.  
809 Bueno, D. Parker, and A. Prince. 2016. Necroptosis Promotes Staphylococcus aureus  
810 Clearance by Inhibiting Excessive Inflammatory Signaling. *Cell Rep* 16: 2219-2230.
- 811 59. Broz, P., T. Ruby, K. Belhocine, D. M. Bouley, N. Kayagaki, V. M. Dixit, and D. M. Monack.  
812 2012. Caspase-11 increases susceptibility to Salmonella infection in the absence of  
813 caspase-1. *Nature* 490: 288-291.

814

815

Figure 1

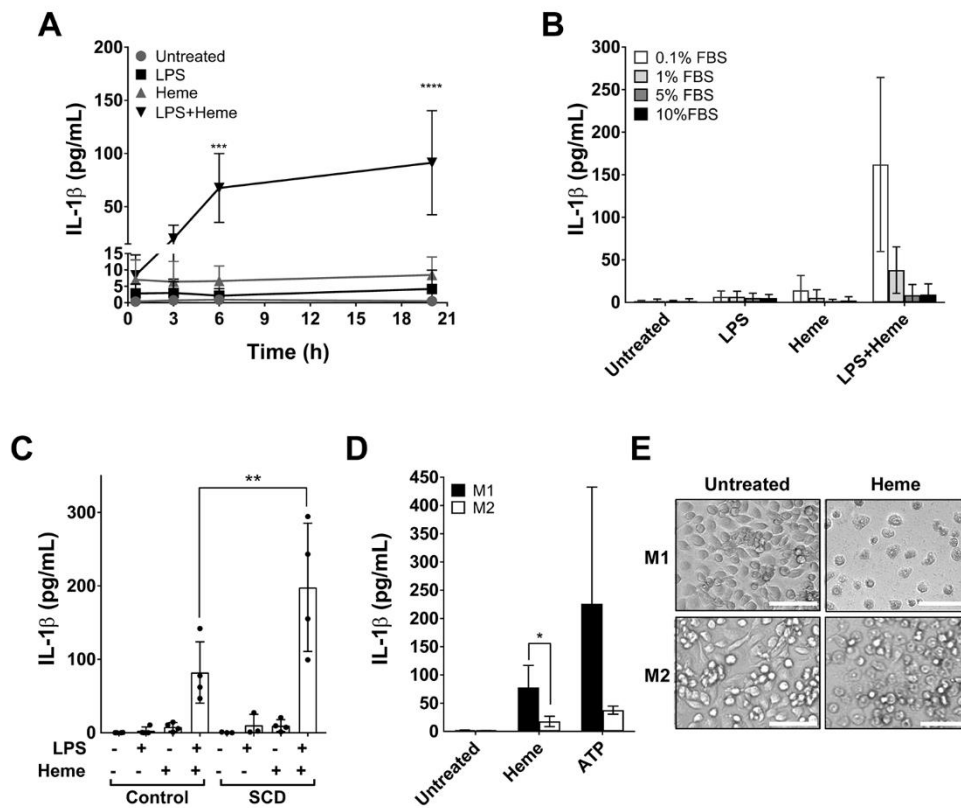

816

817 **Figure 1: Heme induces IL-1 $\beta$  release that is increased in SCD patients. (A)** CD14+  
 818 monocytes were isolated from 5 healthy donors and differentiated into macrophages using GM-  
 819 CSF for 7 days. When fully mature, cells were primed with or without LPS (100 ng/mL) for 3 h,  
 820 washed and treated with or without heme (50  $\mu$ M) in 0.1% FBS. Mature IL-1 $\beta$  levels were  
 821 measured in cellular supernatants by ELISA at the indicated times. Error bars represent standard  
 822 deviation of 5 independent experiments. \*\*\* $p$ <0.001, \*\*\*\* $p$ <0.0001 calculated by 1-way ANOVA.  
 823 **(B)** GM-CSF-differentiated human macrophages from healthy donors were primed with or without  
 824 LPS for 3 h (100 ng/mL), followed by treatment with or without heme (50  $\mu$ M) in 0.1, 1, 5, or 10%  
 825 FBS. After 20 h, IL-1 $\beta$  concentration was measured in cultured supernatants by ELISA. Error bars  
 826 represent standard deviation of 4 independent biological replicates. **(C)** GM-CSF-differentiated  
 827 human macrophages were isolated from healthy donors (control) or patients with sickle cell  
 828 disease (SCD) and primed with or without LPS (100 ng/mL) for 3 h followed by treatment with or  
 829 without heme (50  $\mu$ M) in 0.1% FBS. IL-1 $\beta$  concentration was measured in cultured supernatants  
 830 at 20 h by ELISA. Error bars represent standard deviation of 4 control and 4 SCD samples across  
 831 4 independent experiments. \*\* $p$ <0.01 calculated by 1-way ANOVA. **(D)** CD14+ monocytes were  
 832 isolated from 3-5 healthy donors and differentiated in GM-CSF for 7 days. On day 7, macrophages  
 833 were polarized either into the M2-like phenotype with IL-4 (50 ng/mL) or into the M1-like  
 834 phenotype with GM-CSF for an additional 24 h. On day 8, both groups were washed and primed  
 835 with LPS (100 ng/mL) for 3 h followed by treatment with or without heme (50  $\mu$ M) in 0.1% FBS or  
 836 ATP (5 mM) in 10% FBS. IL-1 $\beta$  concentration was measured in cultured supernatants at 20 h by  
 837 ELISA. Error bars represent standard deviation of 3-5 independent experiments. \* $p$ <0.05  
 838 calculated by Student's *t* test. **(E)** Representative phase-contrast images of M1 and M2  
 839 macrophages from (D) are shown. Scale bar represents 100  $\mu$ m.

840

Figure 2

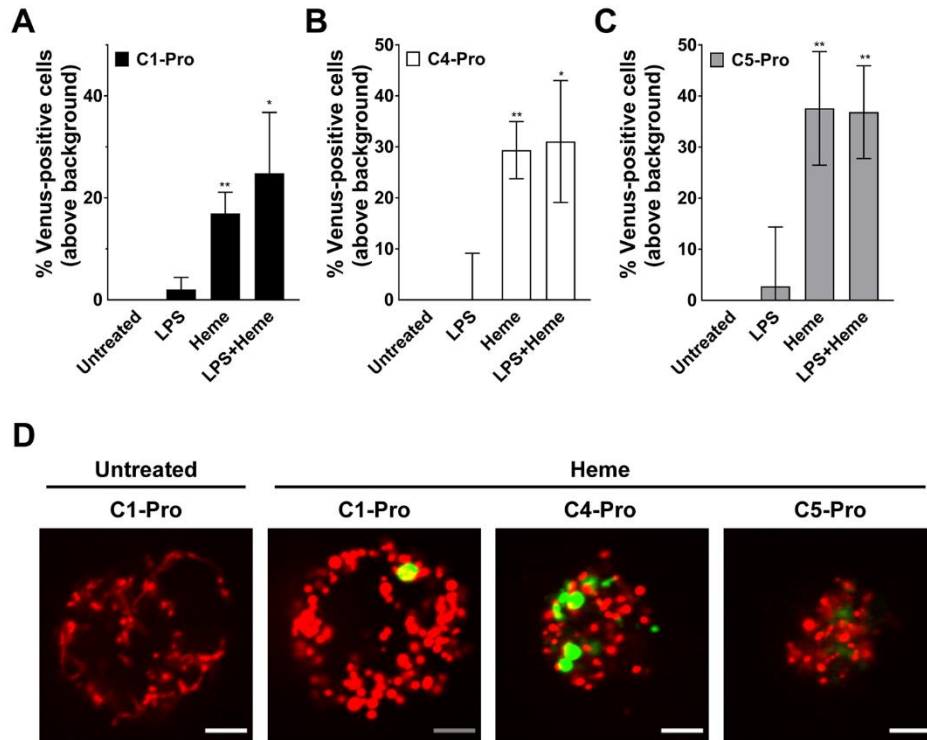

841

842

843 **Figure 2: Heme activates the inflammatory caspases.** GM-CSF-differentiated human  
844 macrophages isolated from healthy donors were transfected with the C1-Pro VC (300 ng) and  
845 C1-Pro VN (300 ng) (**A**); C4-Pro VC (500 ng) and of C4-Pro VN (500 ng) (**B**); or C5-Pro VC (1000  
846 ng) and C5-Pro VN (1000 ng) (**C**); along with dsRedmito (50 ng) as a reporter for transfection. 24  
847 h after transfection, cells were treated with or without LPS (100 ng/mL) for 3 h followed by  
848 treatment with or without heme (50  $\mu$ M) in 0.1% FBS. After 1 h, FBS was reconstituted to 5% to  
849 inhibit extracellular heme. Cells were assessed for the percentage of dsRed-positive transfected  
850 cells that were Venus-positive at 20 h, determined from a minimum of 300 cells per well. Results  
851 are represented as percent Venus-positive cells over background (untreated cells). Error bars  
852 represent standard deviation of four independent experiments. \* $p < 0.05$ ; \*\* $p < 0.01$ ; calculated by  
853 Student's t test. (**D**) Representative images show caspase BiFC in green and mitochondria in red.  
854 Scale bar represents 10  $\mu$ m.

855

856

Figure 3

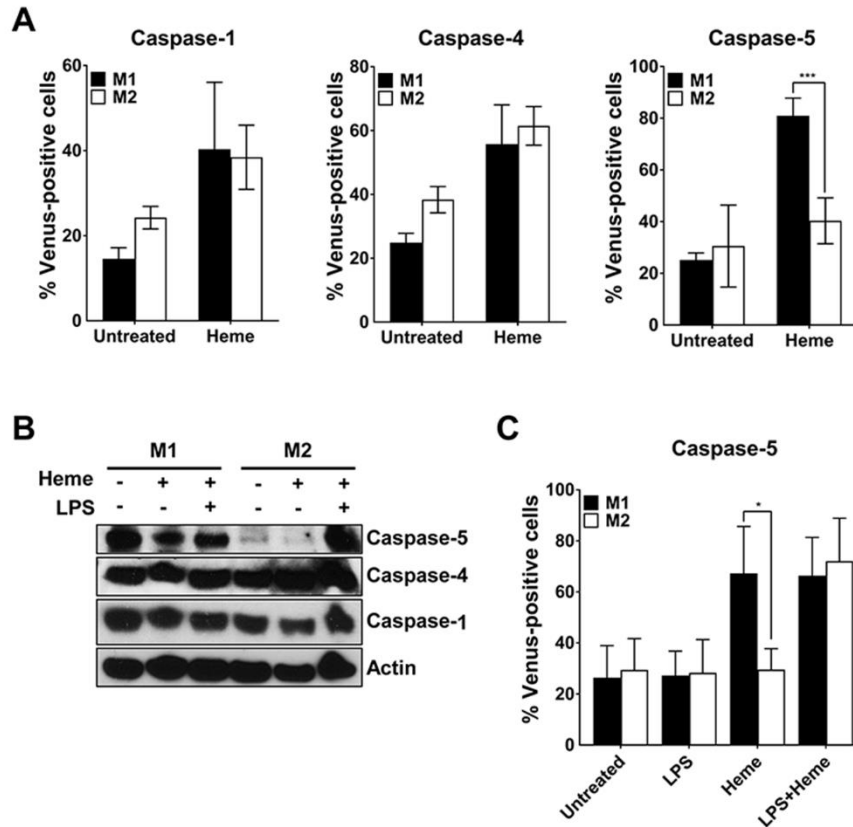

857  
858  
859  
860  
861  
862  
863  
864  
865  
866  
867  
868  
869  
870  
871  
872  
873  
874  
875  
876  
877  
878  
879

**Figure 3: Heme-induced caspase-5 activation and expression is reduced in M2 macrophages.** (A) GM-CSF-differentiated human macrophages isolated from healthy donors were polarized into M1 or M2 macrophages and transfected with the C1-Pro BiFC pair (300 ng of each), the C4-Pro BiFC pair (500 ng of each), or the C5-Pro BiFC pair (1000 ng of each) along with dsRedmito (50 ng) as a reporter for transfection. 24 h after transfection, cells were treated with or without heme (50  $\mu$ M) in 0.1% FBS. After 1 h, FBS was reconstituted to 5% to inhibit extracellular heme. Cells were assessed for the percentage of dsRed-positive transfected cells that were Venus-positive at 20 h, determined from a minimum of 300 cells per well. Error bars represent standard deviation of three independent experiments. \*\*\* $p=0.001$ ; calculated by Student's t test. (B) Cells were polarized to M1 or M2 macrophages as in (A) and treated with or without LPS (100 ng/mL) for 3 h followed by heme (50  $\mu$ M) in 0.1% FBS. After 1 h, FBS was reconstituted to 5% to inhibit extracellular heme and 20 h later cell lysates were immunoblotted for caspase-1, caspase-4, caspase-5, or actin as a loading control. (C) Cells were polarized to M1 or M2 macrophages and transfected with the C5-Pro BiFC pair as in (A). Transfected hMDMs were treated with or without LPS (100 ng/mL) for 3 h followed by heme (50  $\mu$ M) in 0.1% FBS. After 1 h, FBS was reconstituted to 5% to inhibit extracellular heme and 20 h later cells were assessed for the percentage of dsRed-positive transfected cells that were Venus-positive, determined from a minimum of 300 cells per well. Error bars represent standard deviation of three independent experiments. \* $p<0.05$ ; calculated by Student's t test.

Figure 4

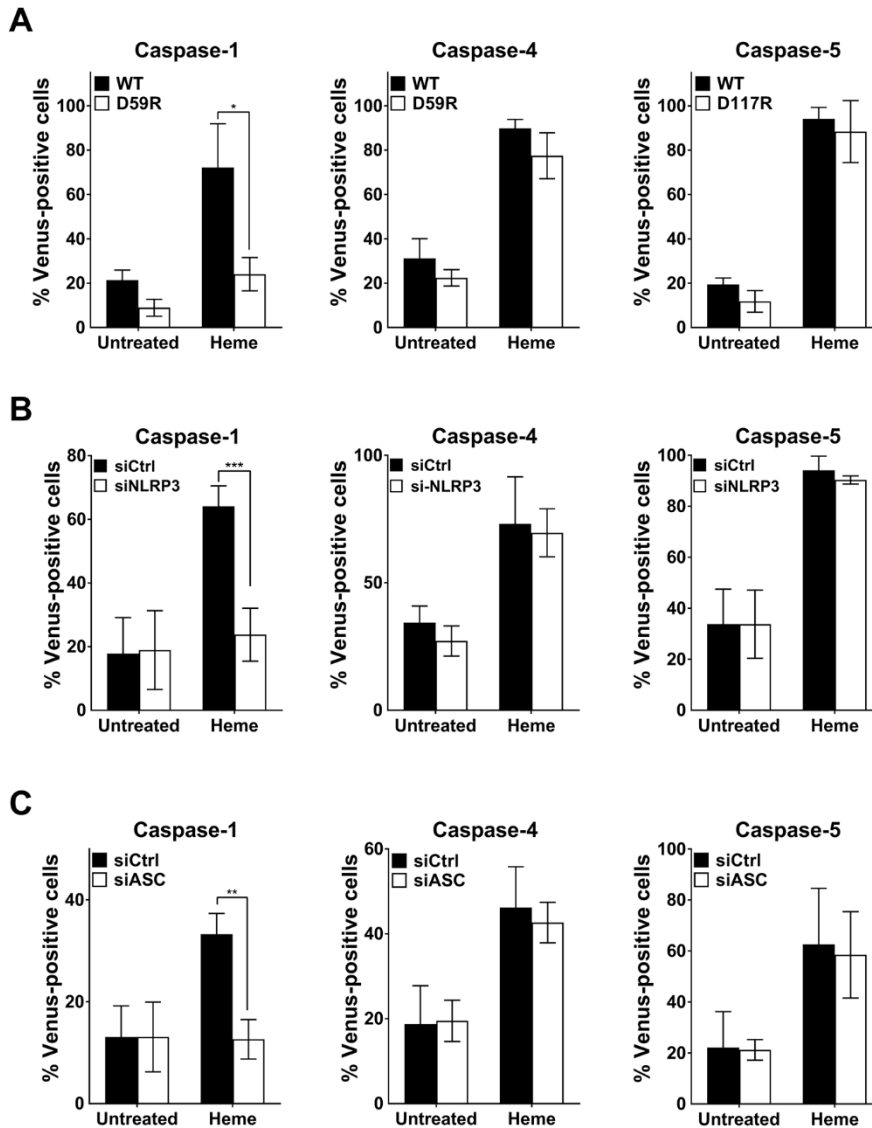

880

881 **Figure 4: Heme activates caspase-4 and caspase-5 independently of canonical**

882 **inflammasome interactions. (A)** GM-CSF-differentiated human macrophages isolated from

883 healthy donors were transfected with the C1-Pro BiFC pair (300 ng of each), the D59R mutant

884 C1-Pro BiFC pair (300 ng of each), the C4-Pro BiFC pair (500 ng of each), the D59R mutant C4-

885 Pro BiFC pair (500 ng of each), the C5-Pro BiFC pair (1000 ng of each), or the D117R mutant

886 C5-Pro BiFC pair (1000 ng of each) along with dsRedmito (50 ng) as a reporter for transfection.

887 24 h after transfection, cells were treated with or without heme (50  $\mu$ M) in 0.1% FBS. After 1 h,

888 FBS was reconstituted to 5% to inhibit extracellular heme. Cells were assessed for the percentage

889 of dsRed-positive transfected cells that were Venus-positive at 20 h, determined from a minimum

890 of 300 cells per well. Error bars represent standard deviation of four independent experiments.

891 \* $p < 0.05$ ; calculated by Student's t test. **(B)** GM-CSF-differentiated human macrophages isolated

892 from healthy donors were transfected with the C1-Pro BiFC pair (300 ng of each), the C4-Pro

893 BiFC pair (500 ng of each), or the C5-Pro BiFC pair (1000 ng of each), along with dsRedmito (50

894 ng) as a reporter for transfection with either siRNA against NLRP3 or a control siRNA (7.5 pmol).

895 24 h after transfection, cells were treated with or without heme (50  $\mu$ M) in 0.1% FBS. After 1 h,  
896 FBS was reconstituted to 5% to inhibit extracellular heme. Cells were assessed for the percentage  
897 of dsRed-positive transfected cells that were Venus-positive at 20 h, determined from a minimum  
898 of 300 cells per well. Error bars represent standard deviation of three independent experiments.  
899 \*\*\* $p < 0.001$ ; calculated by Student's t test. **(C)** GM-CSF-differentiated human macrophages  
900 isolated from healthy donors were transfected with the C1-Pro BiFC pair (300 ng of each), the  
901 C4-Pro BiFC pair (500 ng of each), or the C5-Pro BiFC pair (1000 ng of each), along with  
902 dsRedmito (50 ng) as a reporter for transfection with either siRNA against ASC or a control siRNA  
903 (7.5 pmol). 24 h after transfection, cells were treated with or without heme (50  $\mu$ M) in 0.1% FBS.  
904 After 1 h, FBS was reconstituted to 5% to inhibit extracellular heme. Cells were assessed for the  
905 percentage of dsRed-positive transfected cells that were Venus-positive at 20 h, determined from  
906 a minimum of 300 cells per well. Error bars represent standard deviation of three independent  
907 experiments. \*\* $p < 0.01$ ; calculated by Student's t test.  
908  
909

Figure 5

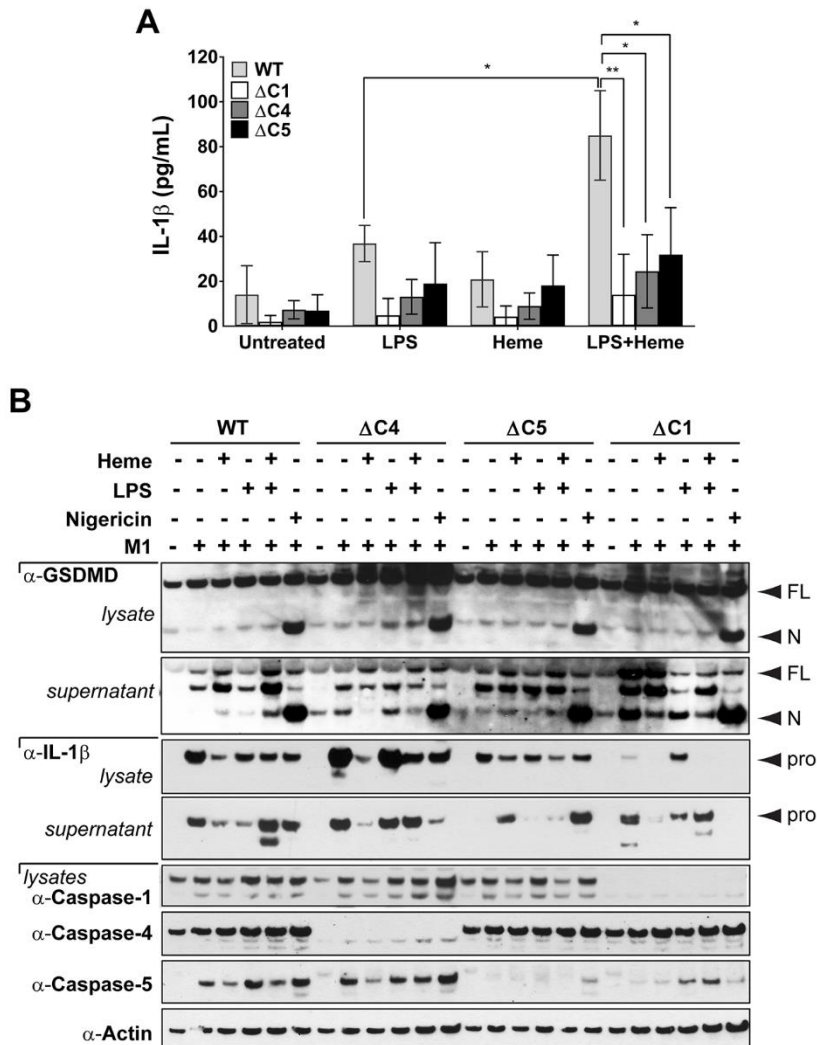

910  
 911 **Figure 5: Heme-induced IL-1 $\beta$  release requires caspase-4 and caspase-5.** (A) THP-1 cells  
 912 (WT), THP-1 cells deficient in caspase-1 ( $\Delta$ C1, generated by shRNA), caspase-4 ( $\Delta$ C4, generated  
 913 by CRISPR/Cas9), or caspase-5 ( $\Delta$ C5, generated by CRISPR/Cas9) were treated with PMA (10  
 914 ng/mL) for one day and allowed to recover for an additional day followed by incubation with IFN $\gamma$   
 915 (20 ng/mL) and LPS (10 pg/mL) for 20 h to polarize them into an M1 phenotype. Cells were treated  
 916 with or without LPS (100 pg/mL) for 3 h followed by heme (50  $\mu$ M) in 0.1% FBS. After 1 h, FBS  
 917 was reconstituted to 5% to inhibit extracellular heme. IL-1 $\beta$  concentration was measured in  
 918 cultured supernatants by ELISA at 20 h. Error bars represent standard deviation of 4 independent  
 919 experiments. \* $p$ <0.05; \*\* $p$ <0.01; calculated by Student's t test. (B) Unstimulated or M1 polarized  
 920 THP-1 cells (M1) were treated with or without LPS (100 pg/mL) for 3 h followed by treatment with  
 921 or without heme (50  $\mu$ M) for 1 h in 0.1% FBS. 20 h later, cell lysates and culture supernatants  
 922 were immunoblotted for the indicated proteins or actin as a loading control. FL, full length; N,  
 923 GSDMD-N-term; pro, pro-IL-1 $\beta$ . Results are representative of three independent experiments.

924  
 925

Figure 6

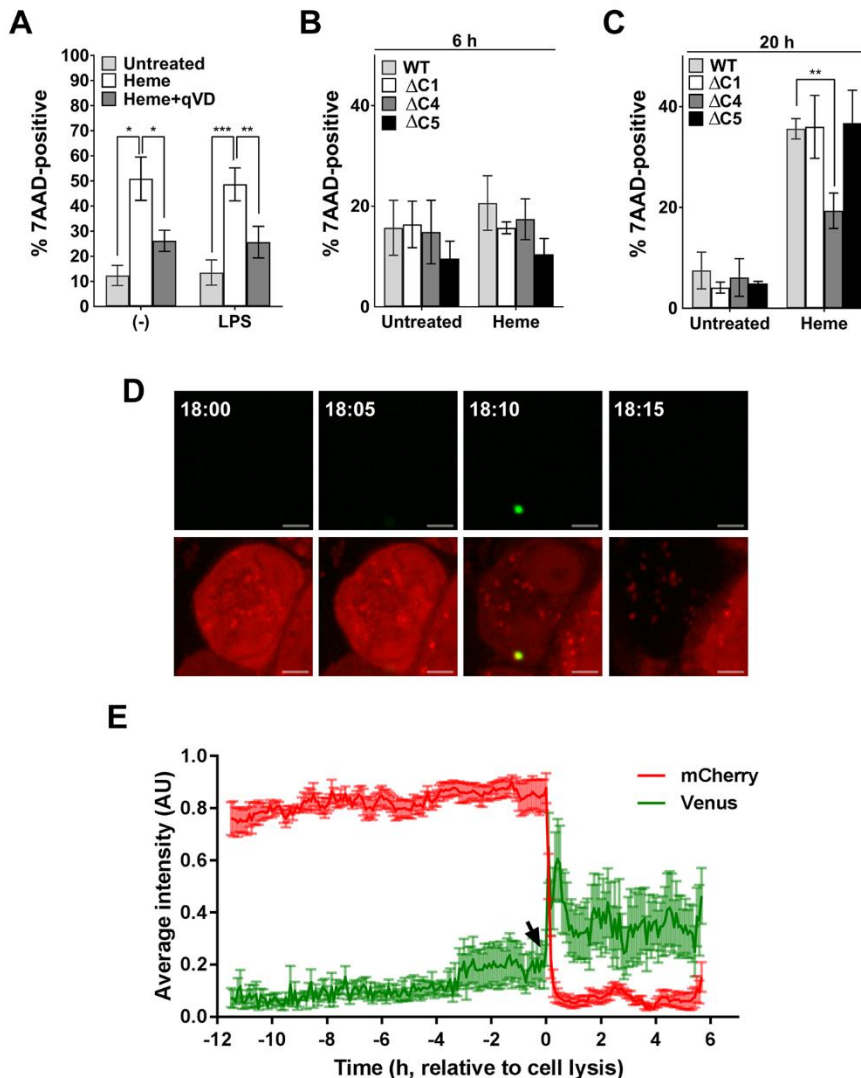

926  
 927 **Figure 6. Caspase-4 contributes to heme-induced cell death.** (A) THP-1 cells were treated  
 928 with or without LPS (100 ng/mL) for 3 h in the presence or absence of qVD-OPH (5 μM) followed  
 929 by treatment with or without heme (50 μM) for 1 h in 0.1% FBS. After 1 h, FBS was reconstituted  
 930 to 5% to inhibit extracellular heme. Cell death was assessed by flow cytometry for 7-AAD uptake  
 931 20 h later. Error bars represent standard deviation of 3 independent experiments. \*p<0.05;  
 932 \*\*p<0.01; \*\*\*p<0.001 calculated by Student's t test. (B-C) THP-1 cells or THP-1 cells deficient in  
 933 the indicated caspases were treated with or without heme (50 μM) as in (A). Cell death was  
 934 assessed by flow cytometry for 7-AAD uptake at 6 h (B) or 20 h (C). Error bars represent standard  
 935 deviation of 3-4 independent experiments. \*\*p<0.01; calculated by Student's t test. (D) PMA-  
 936 primed THP-1 cells stably expressing the C1-Pro BiFC pair were treated with heme in the  
 937 presence of qVD-OPH (5 μM) to prevent cells from lifting off due to apoptosis. Images were taken  
 938 by confocal microscopy every 5 min for 24 h. Frames from the time-lapse show representative  
 939 cells undergoing BiFC (green) prior to cell lysis as measured by the loss mCherry (red). Scale  
 940 bars represent 5 μm. (E) Graph of the cells from (D) that became Venus-positive is shown. Each  
 941 point on the mCherry graph (red) is scaled and aligned to each point on the caspase-1 BiFC graph



942 (*green*) that represents the average intensity of mCherry or Venus in the cell at 5 min intervals  
943 where time=0 is the point of onset of mCherry loss, representing cell lysis. Arrow shows the point  
944 of onset of caspase-1 BiFC immediately prior to cell lysis. Error bars represent SEM of 9 individual  
945 cells.  
946
